# Supplementary material for: Oxygen drives skeletal muscle remodeling in an amphibious fish out of water
Source: Oxford University Press journal article supplement (doi:10.1242/jeb.180257), 2018-01-01
Supplement: jeb180257supp.pdf [file jeb180257supp.pdf]

## Supplementary Material

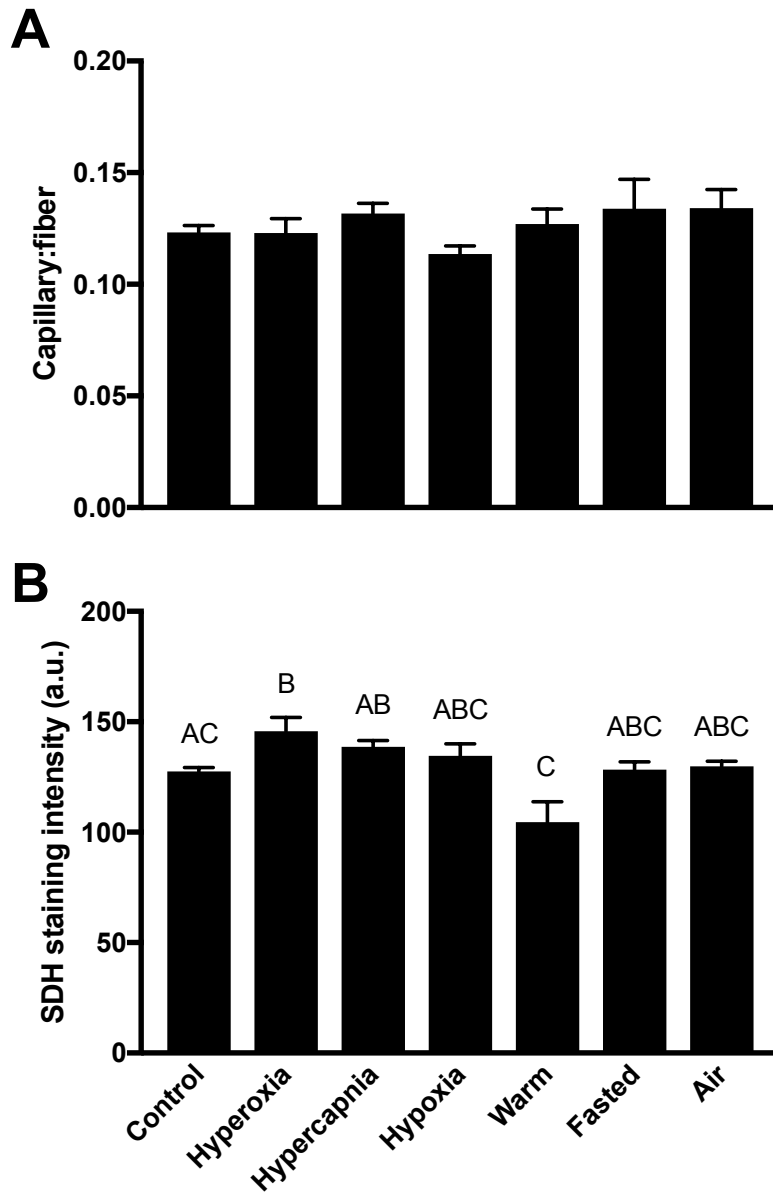

**Figure S1. Characteristics of *K. marmoratus* oxidative skeletal muscle at the lateral line.** Fish were acclimated to control (n=30), air (n=9), fasted (n=8), hypercapnic (n=8), warm (n=8), hypoxic (n=7) or hyperoxic (n=10) conditions for 28 days. (A) Capillary: oxidative fiber ratio. (B) Succinate dehydrogenase (SDH) staining intensity (arbitrary units; a.u.). Means  $\pm$  s.e.m. Letters denote significance detected between treatments ( $P < 0.05$ ).

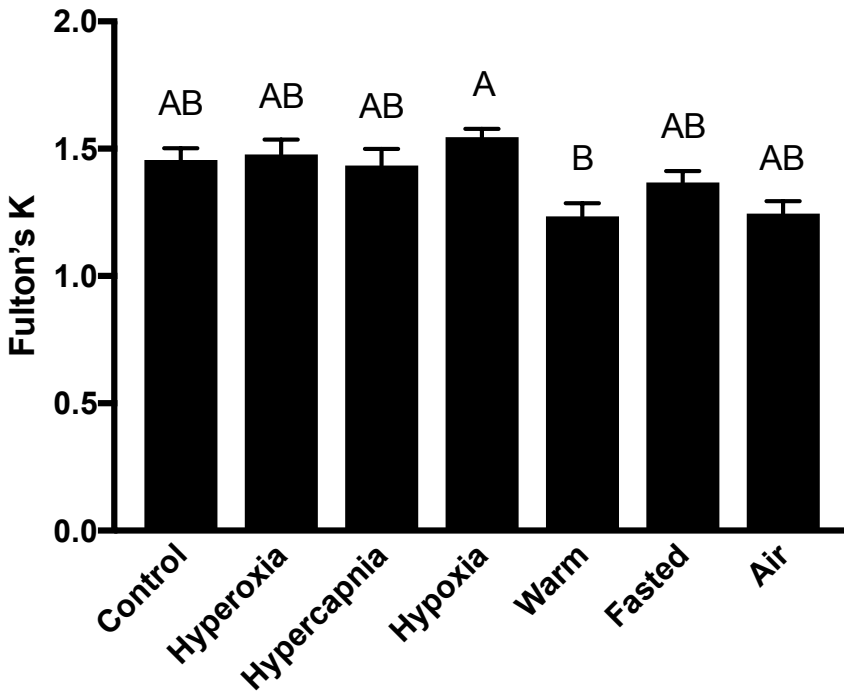

**Figure S2.** Fulton's K of *K. marmoratus* acclimated to control (n=30), air (n=9), fasted (n=8), hypercapnic (n=8), warm (n=8), hypoxic (n=7) or hyperoxic (n=10) conditions for 28 days. Letters denote significance detected between treatments ( $P < 0.05$ ).
